# Supplementary material for: How Do Scientists Know? Answering High School Students’ Questions with an Ecological Sampling Unit
Source: Oxford University Press journal article supplement (doi:10.1525/abt.2021.83.3.165), 2021-03-01
Supplement: abt8303_05_i2_pike_sm_j_dall_sheep_age_photos.docx [file abt8303_05_i2_pike_sm_j_dall_sheep_age_photos.docx]

Dall sheep #1


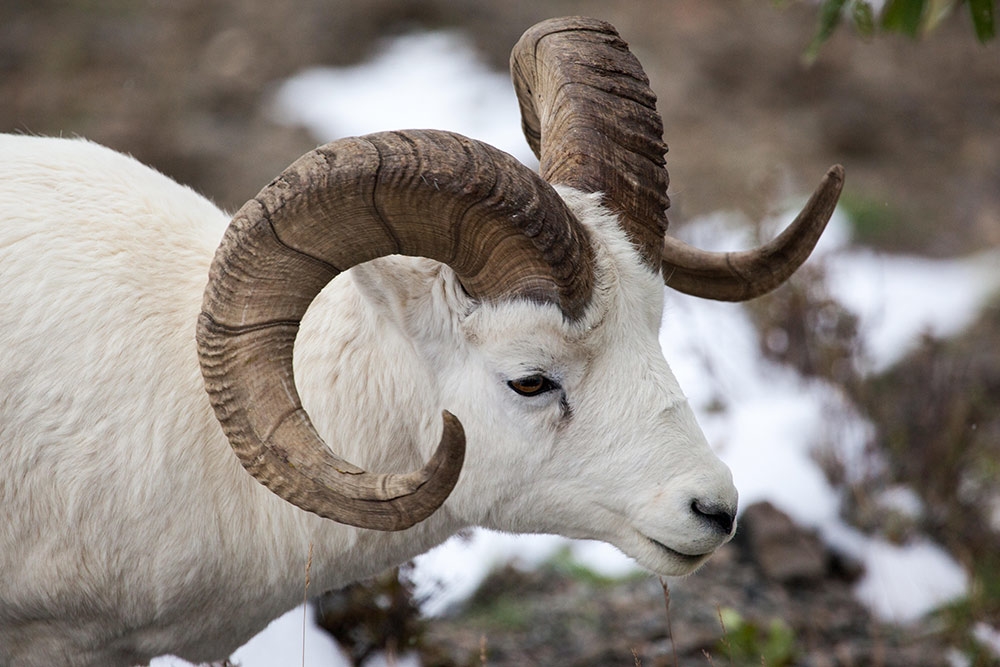


Dall sheep #2


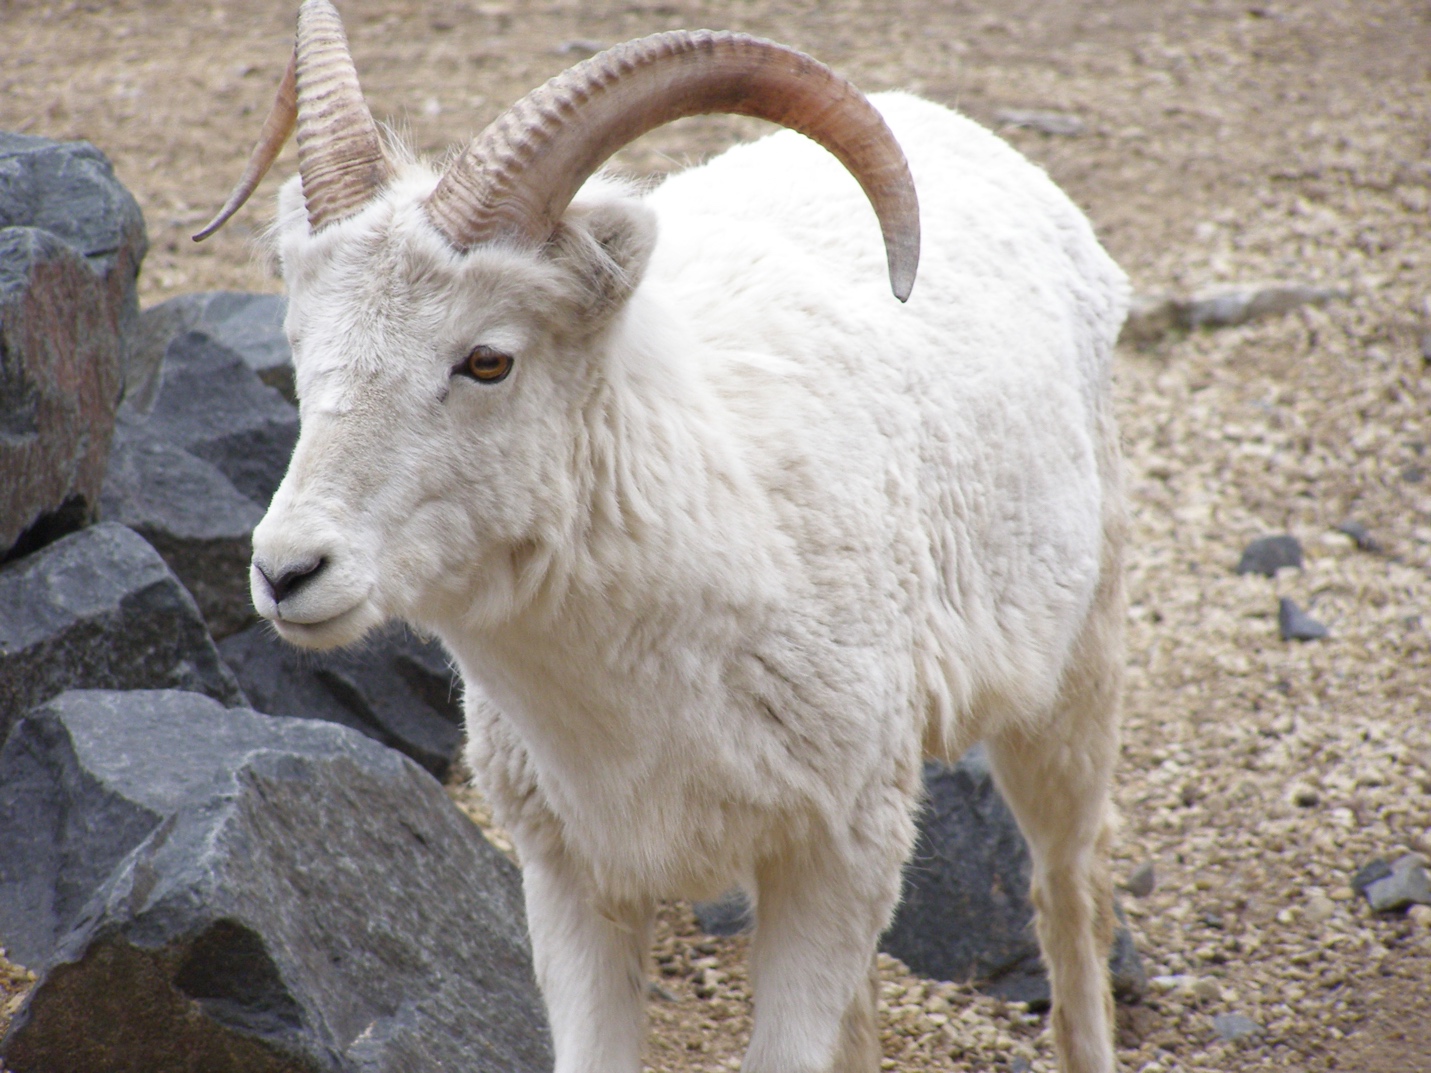


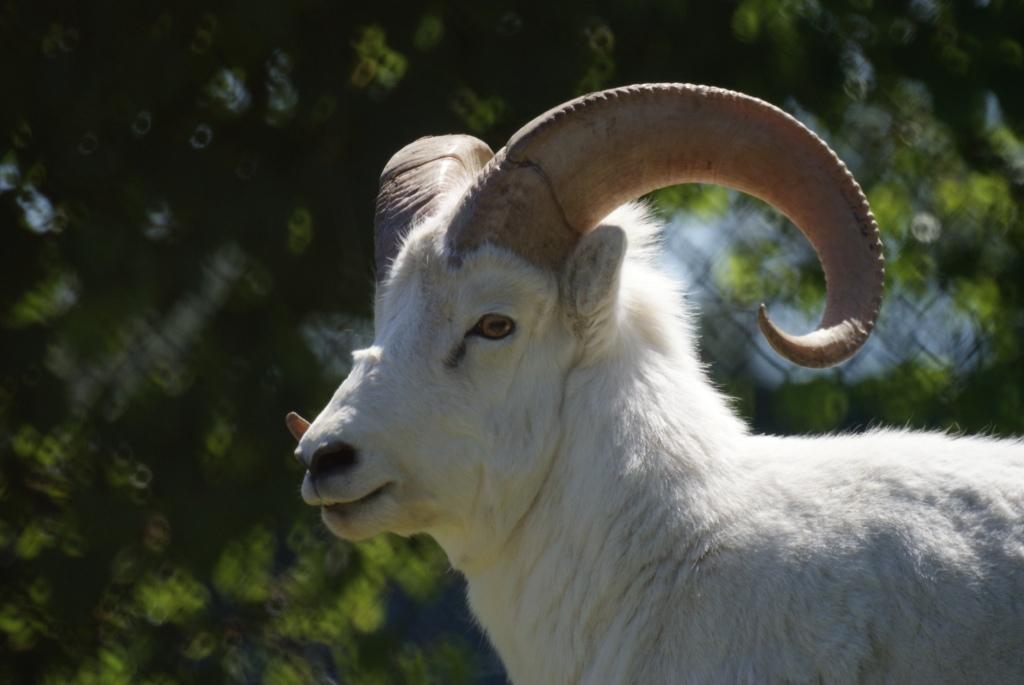


Dall sheep #3


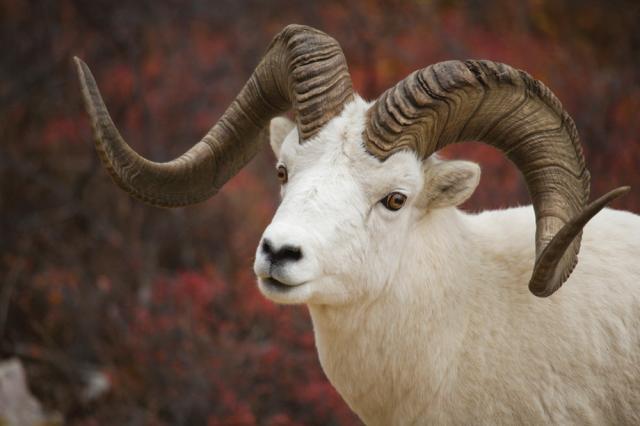


Dall sheep #4


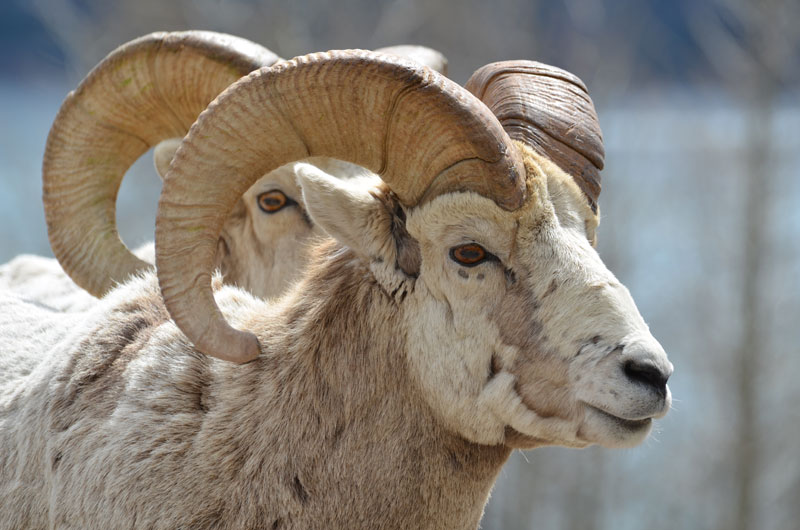


Dall sheep #5


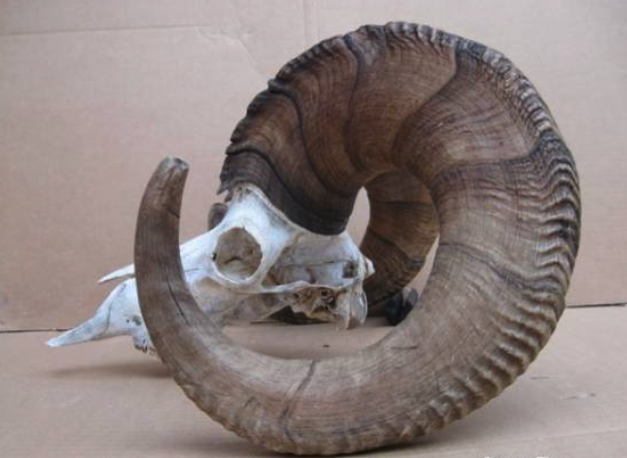
 8 – 9 years old


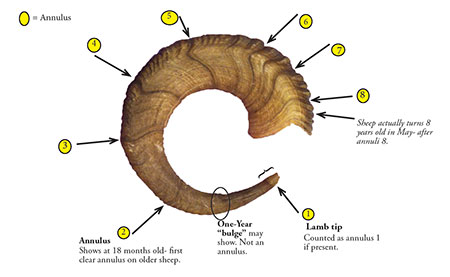


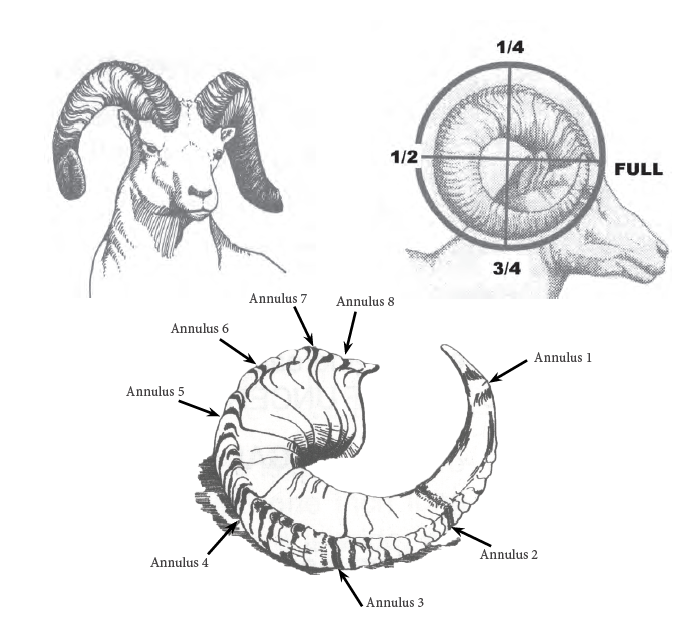


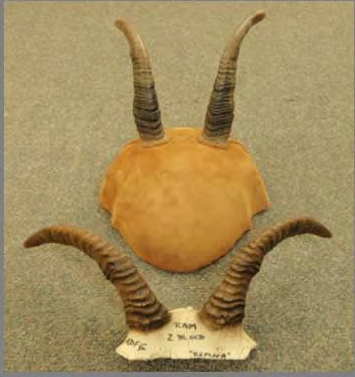


Females (ewes) – top: horns are slender, slightly curved, and don’t get as long as the rams. The 2 year old ram and the 8 year old ewe have horns about the same size.

Males (rams) – bottom: horns grow faster, are thicker at the base, and curl out from base. After the first few years the horns get a lot thicker, and the distance between annuli decreases. Ram horns grow longer than equally aged ewes.

Key:

Sheep 1 - 9-10 yrs

Sheep 2 - 2 yrs

Sheep 3 - 3 yrs

Sheep 4 – 8-9 yrs

Sheep 5 4 yrs
