# Supplementary figures and images for: How Do Scientists Know? Answering High School Students’ Questions with an Ecological Sampling Unit
Source: Oxford University Press journal article supplement (doi:10.1525/abt.2021.83.3.165), 2021-03-01

Tree #1


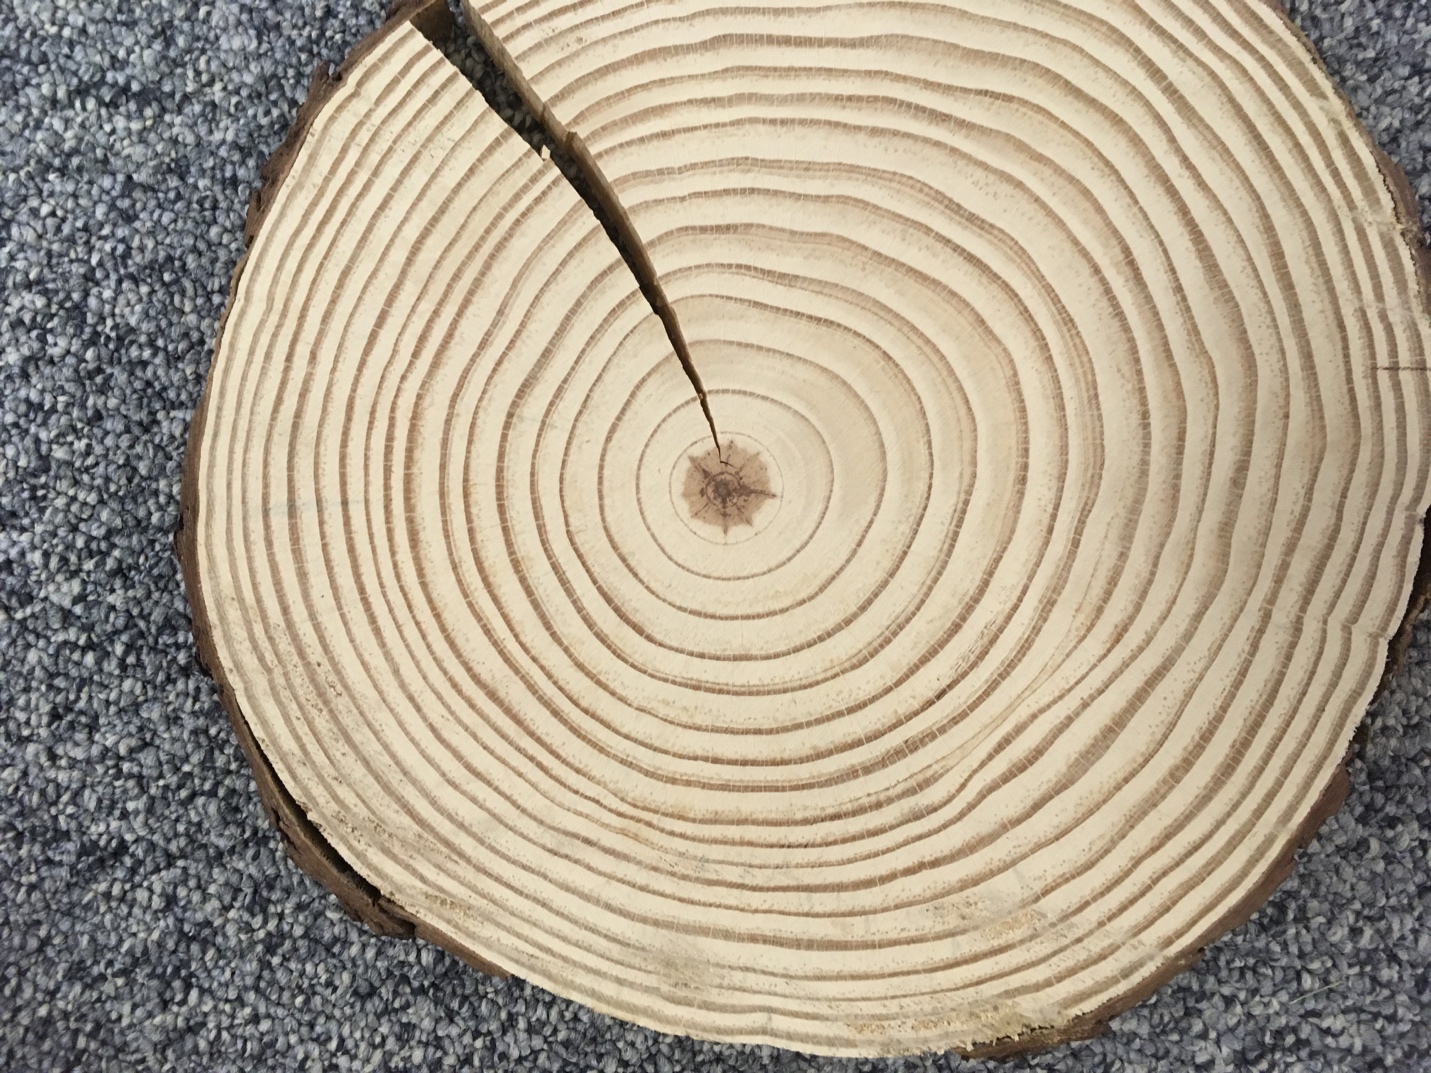


Tree #2


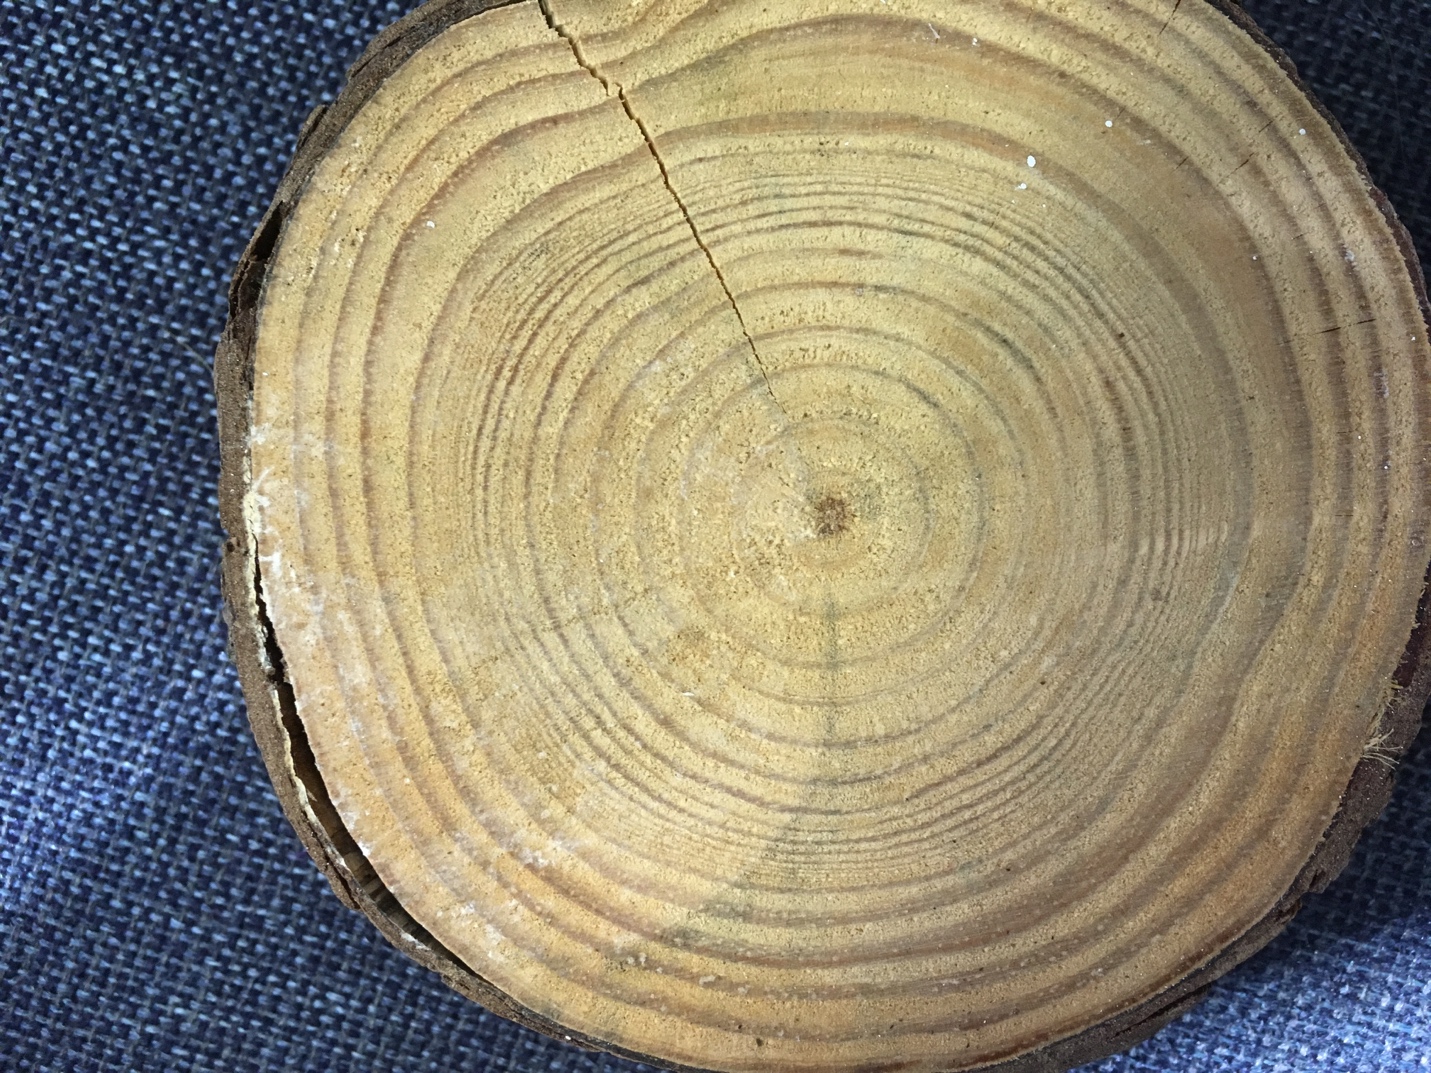


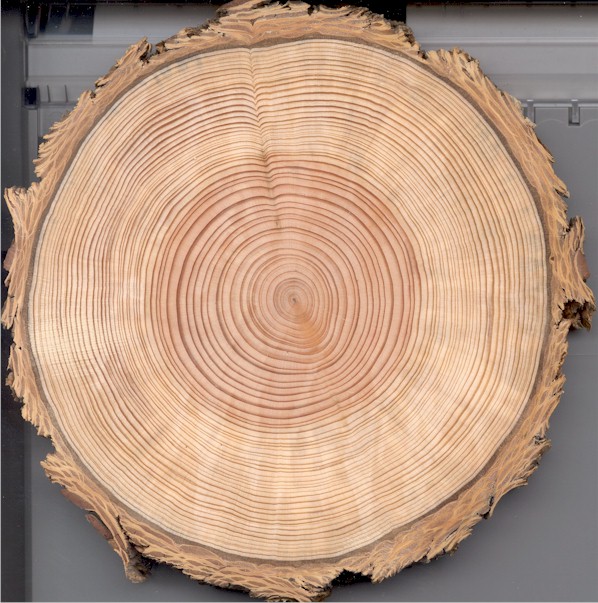


Tree #3


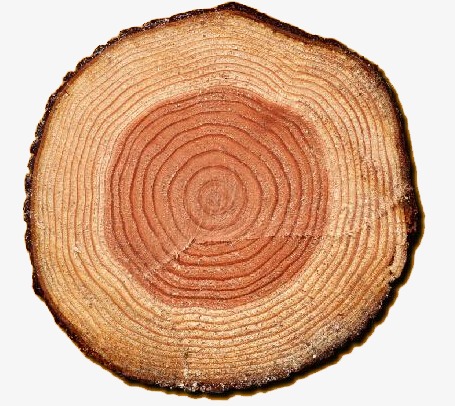


Tree #4

Tree #5


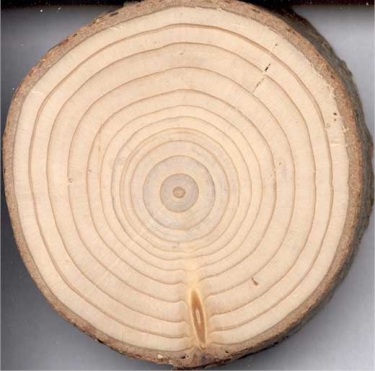


Key

Tree #1 – 19-20

Tree #2 – 19-21

Tree #3 – 50-54

Tree #4 – 20-21

Tree #5 – 12


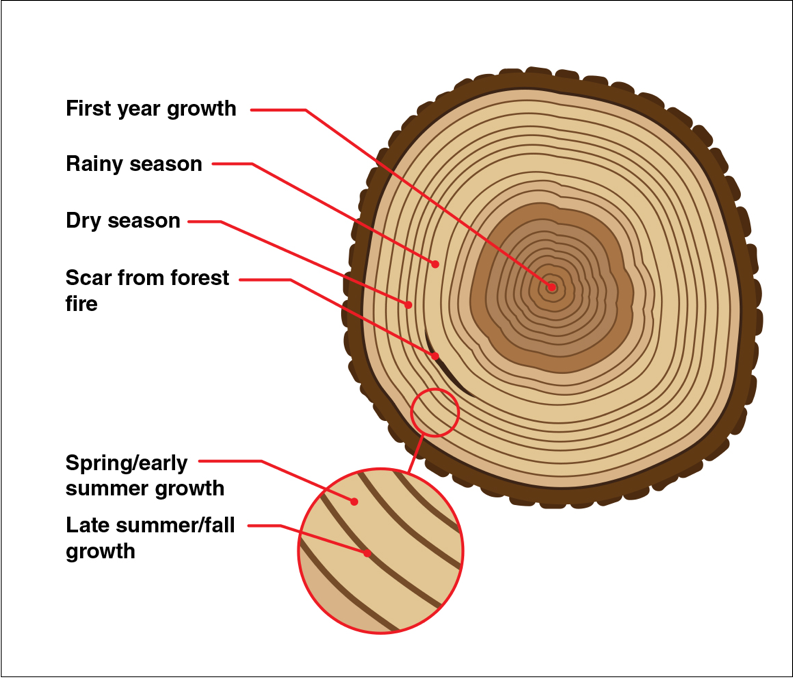


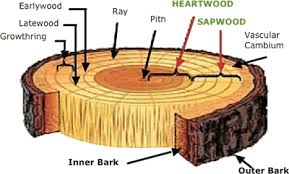


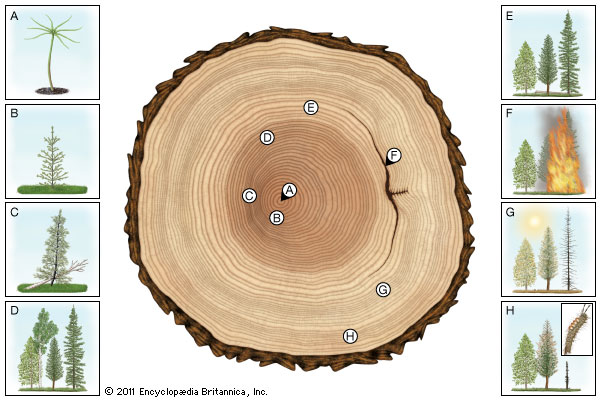

Supplement: abt8303_05_i2_pike_sm_i_tree_ring_photos.docx [file abt8303_05_i2_pike_sm_i_tree_ring_photos.docx]
